# Supplementary material for: microRNA Target Predictions across Seven Drosophila Species and Comparison to Mammalian Targets
Source: PLoS Comput Biol. 2005 Jun 24;1(1):e13. doi: 10.1371/journal.pcbi.0010013 (PMC1183519; doi:10.1371/journal.pcbi.0010013)
Supplement: Table S3 — (20 KB XLS). [file pcbi.0010013.st003.xls]

## Sheet: Sheet1
Table S3: List of mature microRNAs found to be conserved in all flies of the melanogaster and obscura group.
microRNA ID	microRNA sequence
dme-bantam	UGAGAUCAUUUUGAAAGCUGAUU
dme-let-7	UGAGGUAGUAGGUUGUAUAGU
dme-miR-1	UGGAAUGUAAAGAAGUAUGGAG
dme-miR-10	ACCCUGUAGAUCCGAAUUUGU
dme-miR-100	AACCCGUAAAUCCGAACUUGUG
dme-miR-11	CAUCACAGUCUGAGUUCUUGC
dme-miR-12	UGAGUAUUACAUCAGGUACUGGU
dme-miR-124	UAAGGCACGCGGUGAAUGCCAAG
dme-miR-125	UCCCUGAGACCCUAACUUGUGA
dme-miR-133	UUGGUCCCCUUCAACCAGCUGU
dme-miR-13a	UAUCACAGCCAUUUUGAUGAGU
dme-miR-13b	UAUCACAGCCAUUUUGACGAGU
dme-miR-14	UCAGUCUUUUUCUCUCUCCUA
dme-miR-184	UGGACGGAGAACUGAUAAGGGC
dme-miR-184*	CCUUAUCAUUCUCUCGCCCCG
dme-miR-210	UUGUGCGUGUGACAGCGGCUA
dme-miR-219	UGAUUGUCCAAACGCAAUUCUUG
dme-miR-263a	GUUAAUGGCACUGGAAGAAUUCAC
dme-miR-275	UCAGGUACCUGAAGUAGCGCGCG
dme-miR-276a	UAGGAACUUCAUACCGUGCUCU
dme-miR-276a*	CAGCGAGGUAUAGAGUUCCUACG
dme-miR-276b	UAGGAACUUAAUACCGUGCUCU
dme-miR-276b*	CAGCGAGGUAUAGAGUUCCUACG
dme-miR-277	UAAAUGCACUAUCUGGUACGACA
dme-miR-279	UGACUAGAUCCACACUCAUUAA
dme-miR-280	UGUAUUUACGUUGCAUAUGAAAUGAUA
dme-miR-282	AAUCUAGCCUCUACUAGGCUUUGUCUGU
dme-miR-283	UAAAUAUCAGCUGGUAAUUCU
dme-miR-285	UAGCACCAUUCGAAAUCAGUGC
dme-miR-286	UGACUAGACCGAACACUCGUGCU
dme-miR-287	UGUGUUGAAAAUCGUUUGCAC
dme-miR-288	UUUCAUGUCGAUUUCAUUUCAUG
dme-miR-2a	UAUCACAGCCAGCUUUGAUGAGC
dme-miR-2b	UAUCACAGCCAGCUUUGAGGAGC
dme-miR-2c	UAUCACAGCCAGCUUUGAUGGGC
dme-miR-3	UCACUGGGCAAAGUGUGUCUCA
dme-miR-304	UAAUCUCAAUUUGUAAAUGUGAG
dme-miR-305	AUUGUACUUCAUCAGGUGCUCUG
dme-miR-306	UCAGGUACUUAGUGACUCUCAA
dme-miR-307	UCACAACCUCCUUGAGUGAG
dme-miR-308	AAUCACAGGAUUAUACUGUGAG
dme-miR-314	UAUUCGAGCCAAUAAGUUCGG
dme-miR-315	UUUUGAUUGUUGCUCAGAAAGC
dme-miR-316	UGUCUUUUUCCGCUUACUGGCG
dme-miR-317	UGAACACAGCUGGUGGUAUCCAGU
dme-miR-318	UCACUGGGCUUUGUUUAUCUCA
dme-miR-31a	UGGCAAGAUGUCGGCAUAGCUGA
dme-miR-31b	UGGCAAGAUGUCGGAAUAGCUG
dme-miR-33	AGGUGCAUUGUAGUCGCAUUG
dme-miR-34	UGGCAGUGUGGUUAGCUGGUUG
dme-miR-4	AUAAAGCUAGACAACCAUUGA
dme-miR-5	AAAGGAACGAUCGUUGUGAUAUG
dme-miR-6	UAUCACAGUGGCUGUUCUUUUU
dme-miR-7	UGGAAGACUAGUGAUUUUGUUGU
dme-miR-79	UAAAGCUAGAUUACCAAAGCAU
dme-miR-87	UUGAGCAAAAUUUCAGGUGUG
dme-miR-92a	CAUUGCACUUGUCCCGGCCUAU
dme-miR-92b	AAUUGCACUAGUCCCGGCCUGC
dme-miR-9a	UCUUUGGUUAUCUAGCUGUAUGA
dme-miR-9b	UCUUUGGUGAUUUUAGCUGUAUG
dme-miR-9c	UCUUUGGUAUUCUAGCUGUAGA
dme-miR-iab-4-3p	CGGUAUACCUUCAGUAUACGUAAC
dme-miR-iab-4-5p	ACGUAUACUGAAUGUAUCCUGA
dme-miR-281-1*	AAGAGAGCUGUCCGUCGACAGU
dme-miR-281-2*	AAGAGAGCUAUCCGUCGACAGU
dme-miR-281	UGUCAUGGAAUUGCUCUCUUUGU
dme-miR-276b*	CAGCGAGGUAUAGAGUUCCUACG
dme-miR-184*	CCUUAUCAUUCUCUCGCCCCG
dme-miR-276a*	CAGCGAGGUAUAGAGUUCCUACG
dme-miR-309	GCACUGGGUAAAGUUUGUCCUA
dme-miR-289	UAAAUAUUUAAGUGGAGCCUGCGACU
dme-miR-284	UGAAGUCAGCAACUUGAUUCCAGCAAUUG
dme-miR-263b	CUUGGCACUGGGAGAAUUCAC
